# Supplementary material for: Contributions of Emotional Overload, Emotion Dysregulation, and Impulsivity to Eating Patterns in Obese Patients with Binge Eating Disorder and Seeking Bariatric Surgery
Source: PubMed Central journal article supplement (PMC7650699; doi:10.3390/nu12103099), 2020-10-12
Supplement: nutrients-12-03099-s001.pdf [file nutrients-12-03099-s001.pdf]

## Supplementary material

**Table 1:** Results of regularized-method LASSO with inference

| <b>Variables</b>          | <b>Coefficient selected in the model</b> |
|---------------------------|------------------------------------------|
| Age                       |                                          |
| Female/Male               |                                          |
| Emotional eating          | <b>0.0001465112</b>                      |
| Restraint eating          |                                          |
| External eating           |                                          |
| BITE Symptom subscale     | <b>0.2349467593</b>                      |
| BITE Severity subscale    |                                          |
| Beck Depression Inventory |                                          |
| State anxiety inventory   |                                          |
| Trait anxiety inventory   |                                          |
| DERS Non-acceptance       |                                          |
| DERS Goals                |                                          |
| DERS Impulse              |                                          |
| DERS Awareness            |                                          |
| DERS Strategies           | <b>0.0310587560</b>                      |
| DERS Clarity              |                                          |

**Table 2:** Results of regularized-method LASSO with inference.

| <b>Variables</b>                         | <b>coefficients</b> | <b>Z-score</b> | <b>p-value</b> | <b>Low<br/>Conf Pt</b> | <b>Up<br/>Conf Pt</b> | <b>LowTail<br/>Area</b> | <b>UpTail<br/>Area</b> |
|------------------------------------------|---------------------|----------------|----------------|------------------------|-----------------------|-------------------------|------------------------|
| <b>Age</b>                               | 0.063               | 1.358          | <b>0.164</b>   | -0.052                 | 0.194                 | 0.049                   | 0.050                  |
| <b>Female/Male</b>                       | -0.992              | -1.132         | <b>0.204</b>   | -5.231                 | 1.529                 | 0.049                   | 0.049                  |
| <b>Emotional<br/>eating</b>              | 0.077               | 1.578          | <b>0.060</b>   | -0.009                 | 0.545                 | 0.049                   | 0.050                  |
| <b>Restraint<br/>eating</b>              | -0.032              | -0.536         | <b>0.316</b>   | -0.629                 | 0.284                 | 0.050                   | 0.050                  |
| <b>External<br/>eating</b>               | 0.006               | 0.094          | <b>0.910</b>   | -1.934                 | 0.056                 | 0.050                   | 0.050                  |
| <b>BITE<br/>Symptom<br/>subscale</b>     | 0.343               | 2.661          | <b>0.029</b>   | 0.057                  | 0.906                 | 0.049                   | 0.049                  |
| <b>BITE Severity<br/>subscale</b>        | 0.107               | 0.715          | <b>0.466</b>   | -0.545                 | 0.419                 | 0.050                   | 0.050                  |
| <b>Beck<br/>Depression<br/>Inventory</b> | 0.065               | 0.722          | <b>0.618</b>   | -0.604                 | 0.225                 | 0.050                   | 0.050                  |
| <b>State anxiety<br/>inventory</b>       | -0.022              | -0.532         | <b>0.564</b>   | -0.123                 | 0.217                 | 0.050                   | 0.050                  |
| <b>Trait anxiety<br/>inventory</b>       | -0.022              | -0.383         | <b>0.668</b>   | -0.159                 | 0.454                 | 0.049                   | 0.000                  |
| <b>DERS Non-<br/>acceptance</b>          | -0.119              | -1.162         | <b>0.290</b>   | -0.286                 | 0.219                 | 0.050                   | 0.049                  |
| <b>DERS Goals</b>                        | -0.057              | -0.455         | <b>0.653</b>   | -0.233                 | 0.792                 | 0.050                   | 0.050                  |
| <b>DERS Impulse</b>                      | 0.038               | 0.278          | <b>0.680</b>   | -1.457                 | 0.555                 | 0.050                   | 0.050                  |
| <b>DERS<br/>Awareness</b>                | -0.022              | -0.242         | <b>0.780</b>   | -0.188                 | 1.070                 | 0.050                   | 0.050                  |
| <b>DERS<br/>Strategies</b>               | 0.231               | 1.571          | <b>0.170</b>   | -0.202                 | 0.721                 | 0.050                   | 0.049                  |
| <b>DERS Clarity</b>                      | -0.094              | -0.674         | <b>0.281</b>   | -1.332                 | 0.515                 | 0.050                   | 0.050                  |

**Table 3:** Bayesian approach: Population-Level Effects

|                                  | <b>Estimate</b> | <b>Est.Error</b> | <b>l-95%<br/>CI</b> | <b>u-95%<br/>CI</b> | <b>Rhat</b> | <b>Bulk_ESS</b> | <b>Tail_ESS</b> |
|----------------------------------|-----------------|------------------|---------------------|---------------------|-------------|-----------------|-----------------|
| <b>Intercept</b>                 | -10.01          | 4.94             | -19.98              | -0.82               | 1.00        | 3441            | 3134            |
| <b>Age</b>                       | 0.09            | 0.05             | -0.02               | 0.19                | 1.00        | 2691            | 2826            |
| <b>Female/Male</b>               | -1.19           | 0.99             | -3.14               | 0.76                | 1.00        | 3765            | 3065            |
| <b>Emotional eating</b>          | 0.10            | 0.06             | -0.01               | 0.21                | 1.00        | 2970            | 3051            |
| <b>Restraint eating</b>          | -0.04           | 0.07             | -0.18               | 0.09                | 1.00        | 3113            | 2821            |
| <b>External eating</b>           | 0.01            | 0.08             | -0.14               | 0.16                | 1.00        | 3428            | 2967            |
| <b>BITE Symptom subscale</b>     | 0.45            | 0.15             | 0.19                | 0.77                | 1.00        | 2503            | 2248            |
| <b>BITE Severity subscale</b>    | 0.16            | 0.17             | -0.17               | 0.51                | 1.00        | 3822            | 2909            |
| <b>Beck Depression Inventory</b> | 0.08            | 0.10             | -0.11               | 0.29                | 1.00        | 2901            | 2816            |
| <b>State anxiety inventory</b>   | -0.03           | 0.05             | -0.12               | 0.06                | 1.00        | 3478            | 2712            |
| <b>Trait anxiety inventory</b>   | -0.03           | 0.07             | -0.16               | 0.10                | 1.00        | 2957            | 2507            |
| <b>DERS Non-acceptance</b>       | -0.17           | 0.12             | -0.42               | 0.05                | 1.00        | 2248            | 2448            |
| <b>DERS Goals</b>                | -0.06           | 0.14             | -0.34               | 0.21                | 1.00        | 3539            | 3162            |
| <b>DERS Impulse</b>              | 0.04            | 0.15             | -0.27               | 0.34                | 1.00        | 2936            | 2620            |
| <b>DERS Awareness</b>            | -0.03           | 0.10             | -0.23               | 0.17                | 1.00        | 3299            | 2937            |
| <b>DERS Strategies</b>           | 0.32            | 0.17             | 0.00                | 0.68                | 1.00        | 2331            | 2512            |
| <b>DERS Clarity</b>              | -0.13           | 0.16             | -0.46               | 0.18                | 1.00        | 2966            | 3054            |

*Note. Samples: 4 chains, each with iter = 2000; warmup = 1000; thin = 1; total post-warmup samples = 4000.*
